# Supplementary material
Source: publisher figshare collection journal article supplement (https://gsajournals.figshare.com/articles/dataset/_/7578380)
Supplement: Supplementary file 1 [file 1]

## DNA sequence alignment of C and S references.

DNA sequences were extracted from the reference *D. simulans* sequenced genome WUGSC mosaic 1.0/droSim1. Subfamily S : chrU:8,880,559-8,889,066 (strand -), subfamily C: chrU:10,384,153-10,390,953 (strand +) (Fablet et al., 2009, FASEB J. 23: 1482-89). CLUSTAL multiple sequence alignment by MUSCLE (3.8).

```
S      AGTTACCACCCCAACCCCTAAACCCCCACGCCTCTAACGAATCGGACACCGAACC GGGAA
C      -----

S      GACGACA ACTGGAGCACCGCATCCGGCCAAATGCTGACTTAGCAGTCAATGTTGCACAGC
C      -----

S      AACATTGTCGGACAAAGGGAGCCGGCTGACCAAATGCTGAAGTGGCATGGAAATTATGTT
C      -----

S      TACAATTAATACTATGTATATCTATAAGTTGGAAACGGAGGGCTCAAGTGGAGAACCTCC
C      -----TGCAAGTG-----
                      *****

S      GAAAATAAAAAC TACTCTGTTTCTGAATCTTATCGAAGAAAGACGTGTTCTTTAATAAA
C      -----

S      CTTATAAACATACAAACTCAAATTATACAAAAGGAACCCAAGTCACCATCCTGTTTCACG
C      -----

S      CACAGGACTACTTTGATAACTCTCACCGTCCCGCTCCACGCTCAGGTGACGTTGTTAAC
C      -----TACCGTACTG--CCGCGCTCA-----
                      ***** * * ** *****

S      TGGCGCAGCCGGTAGGATGCCCTACCTCATCATTCTTACTTACCTGTAAGTAAACATGTA
C      -----

S      AGAAAAGTAACAAATTATATCTAAAGTCGACCACAGTGATTACAAATAAATACTTAATAC
C      -----

S      AAATTACAATAGTGATAAACCCCAAATGAAACTCAAAACAAACAGAAAATTCTAAATTACC
C      -----

S      CGCGACAACGTGGAATCAAAAGCTGATCATCACCATGTTTTATTATTACATACATTACCAA
C      -----

S      ACACACCACAATTTTTATTTCGACAATGCAAGTGTAACATTACAATGGTGACGTGGAAT
C      -----TTT-----TGGAAT
                      ***                      *****

S      CAAACACTGATCATCACGTCACCGATGTTTCATGCGCTATCAGATACATCATAATTCCC
C      CTATCGCTGAACATCACGCCATCGGTATGTCCATACGCTGCAAA--ACGTCAATAATTTT
* * * ***** * * ***** * * ***** *

S      ACTAACATGTGCAAGTGTAATAATTACTATGGTGACGTGGAATCAAACGCTGATCATCG
C      ATAAAAAAGTGCAAGTGTAACGTA CTGCCGCGCTGACGTGGAATCTATCGCTGATCATCA
* * * ***** * * * * * ***** * *****
```

S CGTCATCGGTATGTTTATACGCTACCAAATACACCATACGAATACCAAACAATTTTTTTTC  
C CGCCATCGGTATGTCCATACGTTGCCAA--ACGTCAT-----AATTTTTATA  
\*\* \*\*\*\*\* \* \*\*

S GACAAA----TGCCAGTGTA AACATTACAATGGTGACGTGGAATCAAACACTGATCAT  
C AAAAAAAGGGTGCAAGTGAACCGTACTGCCGCGCTGACGTGGAATCTATCGCTGATCAT  
\* \*\*\* \*\* \*

S CACGTCATCGGTATGTTTATATGCTATCAAATACATCATACGAATACATCATAATCTTTT  
C CACGTCATCGGTAC-----  
\*\*\*\*\*

S ATTCGACAAATGCCAGTGTA AAAAAAAAAAAAAAAAAAAAAAAAAAATTACAATGG  
C -----TTACA---  
\*\*\*\*\*

S TGATGTGGAATTAAACGCTGATCACCATCTCATCTGTATGACATTACGCTGGCAAAT  
C -----TACGCTGGCCAAC  
\*\*\*\*\* \*\*

S GTATCGCAATACCCATCCGCTTGTGCATATGTATTGTATTTCAAAGCCTTTTTGCATAC  
C GCATCG-----CAAAGCCTCTATATACAC  
\* \*\*\*\* \*\*\*\*\* \* \* \*

S AAATTTACTCAACCATACAATGCCAAGTACACCACAATACGCTCATGTACTGTACCGCTG  
C TTATATATTTGAGCATACAATATCAACTACAATCCAATACATTCACGTACTGTACCGCCT  
\* \* \* \* \*

S TGTGCGGTGGAATCAAACGTTGATCATCACGCTAACTTCAAGTACATATACAG-----  
C CGTTGGCATGGAATCAAACGCTGATCACCATGCCACTGTGGTAAACAAACGAAGCACC  
\*\*\*\*\*

S -----CCAACACACTCATACATTC-AAACGTACACCGCTA-----AAGAACCA  
C AGCCTTTCTAATACA-TTGTACACTCAAACGTACACTGCCATACGTCGGCGAAAAATCA  
\* \* \* \* \* \*\*\*\*\* \*\*

S AAACACAGACACCCCTCACTGCCGAAATGTAAACAAATATCACATTTCAATTCAAGCGAAT  
C AAACA-----TAAGCAAAAT--CATTTCAAACCAAGCGAGG  
\*\*\*\*\*

S TTCATCTTGAGTGTCACTGCGATAACGACGCCGCAAGAGCATTTGCGCACCCATTCTGG  
C CTCATTCTGCGTACCACAGCGACAACGACGCTGCATGTGTAGTGCGCACCCATGTCTGG  
\*\*\*\* \*\* \*

S GGAGCCGAAATACAGAATAAATGCTTGAGTGTGTCGTCGAGCTATTTTGCCTTTGCTCTCC  
C GTAGCCGAGGTAAAGGGGAAACTCTCGAGTATCGTCAAGTGTTCTCGCCTTTACCCCTTC  
\* \*\*\*\*\* \*\* \*

S TACAAAGTGTGGCTCTCTCATGTA-TGCATATAC-AAATAAATAAAACA-ATGTATCAA  
C TACAATGGGTTGCTACGCTCATGTATTGCACATTCAAATAACCAAAACATATGTACTAA  
\*\*\*\*\* \* \* \*

S AAGGGTCGACATATAC--ATATACTTTGTTTCTTTTCATTGTGAAATTCTGTTTGTCAA  
C AGAAGTCGACATATACAGATATATTTGTTTCTTTTCATTGTGTAATTTTGTATATCAA  
\* \*\*\*\*\*

S TAAATACTAATATCAACCACATTGCAGAGCTTGCAAAATCAAGGACGTACAAATTAAGT  
C CAAATACTAATACCAATCACATTGCAGA---ACAAAAAGGGGAAATATAAAGCCAAAG  
\*\*\*\*\*

S TCACACCTAAAACTAAAATACATCATATACATACTTTACATAGGGATAAATATCCACAT  
C ACACAC-----  
\*\*\*\*\*

S AAAATTTAAATTACCATTTATATTACATACCTACACACTCTCTTAAGTAAGAAAATTTGT  
C ----- -ACCCATACACTCTAGTAAACAAG -AAATTTGT  
\*\*\* \* \*\*\*\*\* \*\*

S TCATTATTTCCCGACC - TACGCAATTTATTAAGTAACCTCTAAATTTAATGTC -AAAAAGT  
C TCATTATTTTTCAATCATACATAATATATTAAGTAACCTCAAATTTAATGTCAAAAAAGT  
\*\*\*\*\* \* \* \* \* \* \*\*\*\*\*

S TCGTTTATAACCTTAGGAAGACTACACGCTCAGTTGTTGGGGCTTCACCAAACACTAGTA  
C TCGTTTACAACCTTAGGAAAACCTACACGTTGTTGTTGGAGTTCCACCAAACACTAATA  
\*\*\*\*\* \*\*\*\*\* \* \* \*\*\*\*\*

S AGCTCCCACGCCCGGTTAGACGTTCTGACCCCTTCTCCAATTTTCGGAAGAGCCTAAAT  
C GGCCCCACATCCCGTTAGACGTCCTGACTCCCTTCCCCGATTTTCGGAAGAACCCAAAT  
\* \* \* \* \* \* \* \* \* \* \* \* \* \* \* \* \* \* \* \* \*

S TAACTTCCCCTCAAAACCCTATAATGGACTCAGGAAACGATTCTATACGCCCCACTCCAC  
C CAATACCTTCCCAAACCCCATTAATGGACTCGGGAACGATTCTGCCCGTCCCACTCCAT  
\* \* \* \* \* \* \* \* \* \* \* \* \* \* \* \* \* \* \* \* \*

S CCCCTTTAACGCCTACCGTCAGCGTTTTAGCTCTGCACTTTCAACTACGTTTGGACCCA  
C CCCCTCTGGCGCCCACTGTCAGTGGTATTAGCTCCTTAATTTCAACTACGTTCAAGCCTA  
\*\*\*\*\* \* \* \* \* \* \* \* \* \* \* \* \* \* \* \* \* \* \* \*

S AAAACGTTTTGGCATTTCGTTGAGCGTTTGCCAAACTTTGACGGTACACCCCGTCAATTAG  
C AAGATATCATGGCATTGTGTTGAGCATTGCAACCTTTGATGGTACACCTCGTCTATTGG  
\* \* \* \* \* \* \* \* \* \* \* \* \* \* \* \* \* \* \* \* \*

S ATAGGTTTCATCACTAGCGTAGAGGAAATTCTGATGCTCATTAGAGGAGCGGACCAAACAC  
C ATAGGTTTATCACTAGCGTAGAAGAAATCCTGATGCTCATCAGGGGAGCTGACCAAACAC  
\*\*\*\*\* \*\*\*\*\* \* \* \* \* \* \* \* \* \* \* \*

S CGTATGGCCTGCTCACTCTGCGGACTATCAGAAACAAAATTATTGATAGGGCTGACGAAG  
C CGTATGGCCTGCTTACTCTGAGGACCATCAGGAACAAAATCATTGATAGGGCCGACGAAG  
\*\*\*\*\* \*\*\*\*\* \* \* \* \* \* \* \* \* \* \* \*

S CCTTGGAGCTCGCAAATGTACCTTTGGTCTGGGATGAGATTAAGCAATCTCATCCGTC  
C CCTTGGAACTGGCGAATACCCCTTGGTTTGGGATGAGATTAAGCAATCTCATCCGCC  
\*\*\*\*\* \* \* \* \* \* \* \* \* \* \* \* \* \* \* \* \* \* \*

S TGTACGCGAGTAAAAAAGTGAGGCCAAGTTGCTAGCCGAGATTAATTCATTTCCAGACA  
C TTTACTCGAGCAAGAAAAGCGAGGCCAAGTTGTTAAGCGAGCTTAACACATTTTCGGACA  
\* \* \* \* \* \* \* \* \* \* \* \* \* \* \* \* \* \* \* \* \*

S ATCTGACTTTGGGGCAACTCTTCTTTGGTATATCAAAGCTCAGAAGCCAAGTCTTCTCTG  
C ACCTGACCTTGGGCCAAGTCTTCTTTGGTATATCAAAGGTGAGAAGCCAAGTCTTCTCCA  
\* \* \* \* \* \* \* \* \* \* \* \* \* \* \* \* \* \* \* \* \*

S TACTCAAGAATAGTGAGCACAGCAACGCCGTTGTAGACGCCAAAAAGGATGTTTACAACG  
C TACTCAAGAACAGCGAACACAACAACACTGTTGTAGATGCAAAAAAGGTTGTCTACAACG  
\*\*\*\*\* \* \* \* \* \* \* \* \* \* \* \* \* \* \* \* \* \*

S AGGTTTGTCTCAATGCATTTATGTGAGGCTGAGGGAACCTCTTAAACTTTTCGTCAGGT  
C AGGTTTGTCTCAATGCTTTTATGACTGGTTTGAAGGAACCTCTCAAGACTTTTCGTCAGGA  
\*\*\*\*\* \* \* \* \* \* \* \* \* \* \* \* \* \* \* \* \* \*

S TAAAGTCAACCCCCACCTTGAACAGGCATACGAACAATGTCAAGTAGAACAGAACACAT  
C TAAAGTCCCCTTCTACACTTGACCAGGCGTACGAGCAATGCCAATAGAGCAGACCTTAT  
\*\*\*\*\* \* \* \* \* \* \* \* \* \* \* \* \* \* \* \* \* \*

S CCAGGTTACAACAAAACCGATCGAACAGAACAGAACAGAGACCTAATGTACCAGATAGTA  
C ATAGGGCACAAAACAAGCGAACCAACAGACCAGAGCAGGGACCCAATGGATCAGACAATA  
\*\*\* \* \* \* \* \* \* \* \* \* \* \* \* \* \* \* \* \* \*

[illegible]

S CACAAATCGTTACAAGCCCTTCAAGTCGAACATCTCTCCTCTGAAGAGAAACGGGGGTT  
C CGCAGCGTCGTTACAAGCCCTTGGCGTCGATCACCTCTCCTCTGAAGAGAAACAAAGCCT  
\* \* \* \* \* \* \* \* \* \* \* \* \* \* \* \* \* \* \* \* \* \* \* \* \* \* \*

S ACTTTCACTTTGC AAAAGTATTTGGACATTTTACAACGAGGACAAACCACTTACTTT  
C ACTTTCACTTTGC AAAAGTTATCTAGATATCTTCTACAATGAAGACAAATCATTGACCTT  
\* \* \* \* \* \* \* \* \* \* \* \* \* \* \* \* \* \* \* \* \* \* \* \* \* \* \*

S CACGAACAAGATTACACACACGATTAAAACACGGACGATACCCCTATTACACAAAAATC  
C CACCAACAAGATTACACACACGATTAAAACACGGACGACACCCCCATTACATAAAAATC  
\* \* \* \* \* \* \* \* \* \* \* \* \* \* \* \* \* \* \* \* \* \* \* \* \* \* \*

S TTATAGGTATCCTTATATTTCATAAAGAAGAGGTAAAAAACAGATAGAGTTGATGTTAAA  
C TTATAGATATCCTTACATTTCATAAGGAGGAGGTCAAAAAACAAATAGAGGCAATGTTAAA  
\* \* \* \* \* \* \* \* \* \* \* \* \* \* \* \* \* \* \* \* \* \* \* \* \* \* \*

S TCAAGATATCATTAATCCAGTTACTCCCCATGGAGCGCCCCGCTCTGGGTCGTTCCCTAA  
C TCAGGACATTATCAAATCCAGTTATTCCCCGTGGAGCGCCCCGCTCTGGGTCGTTCCCAAA  
\* \* \* \* \* \* \* \* \* \* \* \* \* \* \* \* \* \* \* \* \* \* \* \* \* \* \*

S AAAAGCCACTCCTACGGGAGAACAAAAATGGCGTCTTGTTATCGACTATAGGAAGCTTAA  
C GAAAATCACTCCTACGGGACAGCAAAAATGGCGTCTAGTTATCGATTATAGAAAACCTCAA  
\* \* \* \* \* \* \* \* \* \* \* \* \* \* \* \* \* \* \* \* \* \* \* \* \* \* \*

S TGAAAAAACTATATCCGATAGATACCCCATACCTAACATCGCGGACATCTTAGACAGACT  
C CGAGAAGACTATATCCGATAGATATCCAATACCTAACATCGCGGATATCTTAGACAGATT  
\* \* \* \* \* \* \* \* \* \* \* \* \* \* \* \* \* \* \* \* \* \* \* \* \* \* \*

S AGGCAAGGCTAAATACTTTTCTACACTTGATTTAGCAAGTGGATTTTCATCAAATAGAAAT  
C GGGCAAAGCCAAATATTTCTCCACACTTGATCTGGCAAGTGGATTCCATCAGATAGAAAT  
\* \* \* \* \* \* \* \* \* \* \* \* \* \* \* \* \* \* \* \* \* \* \* \* \* \* \*

S GAATTCTGACGACATACCCAAAACCTGCATTTACAGTAGAGTGAGGTCATTACGAGTTTCAT  
C GAATCCCGACGACACACCCAAAACCTGCATTTACAGTAGAGGGGGTCACTACGAGTTTCAT  
\* \* \* \* \* \* \* \* \* \* \* \* \* \* \* \* \* \* \* \* \* \* \* \* \* \* \*

S TAGAATGCCGTTCCGGTCTTAAAAATGCTCCAGCCACCTTTCAAAGGGTGATGGATAACAT  
C TAGAATGCCGTTTGGCCTCAAAAATGCCCCAGCCACATTCAAAGGGTGATGGACATTAT  
\* \* \* \* \* \* \* \* \* \* \* \* \* \* \* \* \* \* \* \* \* \* \* \* \* \* \*

S TTTTGGAGACCTTATCGGATCTATTTGCTTAGTTTATTTAGATGATATAATTATTTT - TC  
C TTTTGGAGACCTTATCGGAACTATCTGCCAGTTTACCTAGATGATATAATAATTTTCTC  
\* \* \* \* \* \* \* \* \* \* \* \* \* \* \* \* \* \* \* \* \* \* \* \* \* \* \*

S GACTTCCTTGCAAGAACACCTCATACACTTAAAAACTATTTTCGAGAGACTCAGGTCTGC  
C AACCTCCTTACAAGAACATTTTCATACACTTGAAAACCTATTTTGAAGACTCAGATCTGC  
\* \* \* \* \* \* \* \* \* \* \* \* \* \* \* \* \* \* \* \* \* \* \* \* \* \* \*

S CAACTTTAAAGTACAACCTAACTAAATCTAACTTCCTCAGACAGGAGACAGAATTCCTTGG  
C CAACTTTAAAGTCCAACCTACAAAATCCTACTTCCTCAGGCGGGAGACAGAATTCCTTGG  
\* \* \* \* \* \* \* \* \* \* \* \* \* \* \* \* \* \* \* \* \* \* \* \* \* \* \*

S CCACATCGTTACCCAAGAAGGCGTAAAGCCAAATCCCAATAAGATTGAGGCCATTAAAAA  
C CCACATCGTTTACAAGAAGGTGTTAGGCCAAATCCCAATAAGATCGAAGCTATAAAAAA  
\* \* \* \* \* \* \* \* \* \* \* \* \* \* \* \* \* \* \* \* \* \* \* \* \* \* \*

S CTTCCCATGCCCCCATAGTAAAAAGTCAATTAAGTCTTTTCTCGGTTTCCTAGGTTATTA  
C CTTTCCATGTCCCCACAGTAAAAAGTCAATTAAGTCTTTCTAGGGTTGTTGGGATATTA  
\* \* \* \* \* \* \* \* \* \* \* \* \* \* \* \* \* \* \* \* \* \* \* \* \* \* \*

S TAGGAAGTTTCATCAAAGATTTTGCAGAGAATTACCCAACCCATGACAAAGAAATTAAGGG  
C CAGAAAATTTATCAGAGATTTTGCAGAGACTTACCCAACCCATGACACAAAAATTAAGGGG  
\* \* \* \* \* \* \* \* \* \* \* \* \* \* \* \* \* \* \* \* \* \* \* \* \* \* \*

S CAACAATAAATCGATCGTAATAGACGATGAATTCAAAGAAGCCTTCGAATCTTGTA AAC  
C AAACAATAAATCGATCATAATAGATGATGAATTCAAAAAGGCCTTTGAATATTGCA AAC  
\*\*\*\*\*

S TTTGCTGTCCAATGACCCTATTCTACAATACCCGGACTTTACGAAACCTTTTACACTAAC  
C CTTACTTTCTAACGACCCAATCCTCCAATACCCGGACTTTACAAAACCTTTTACACTAAC  
\*\* \*\* \*

S CACTGACGCAAGTAATTTTGCAATAGGAGCTGTCTTATCACAAGGTCCAGTACACAGTGA  
C -----TATCCAAGGGCCGGTGCATAGTGA  
\*\*\*\*\*

S TAAACCTGTGTGTTTCGCCAGTAGAACCTATCAACTGCGGAAACAACTATTCCACAAT  
C TAGGCCCGTATGTTTTGCTAGTAGAACCTTGTGCGCTGCGGAAACAAATTATTCCACAAT  
\*\* \*\* \*

S TGAGAAGGAAATGCTGGCCATTATATGGGCAGTCCAATACTTCAGACCTTACCTCTTTGG  
C TGAGAAGGAAATGCTGGCCATTATATGGGCGGTCCAATACTTCAGACCTTACCTCTTTGG  
\*\*\*\*\*

S CAAAAGATTAACCATGTTACCGATCACAAACCATTAACCTTGGTTAATGAATTTTAAACA  
C CAGGAGATTACCATTAATCACCGATCACAAACCACTAACCTTGGTTAATGAATTTCAAACA  
\*\* \*\*\*\*\*

S ACCAAATTCTAAATAATTTCGGTGGAGACTGCAGTTGCAAGAGTACGATTTTCAAGTCAT  
C ACCAAATTCTAAATAGTTAGGTGGAGACTCCAGCTTCAGGAGTACGATTTTCAAGTCGT  
\*\*\*\*\*

S TTATAAAAAGGGCTCTCAAAACGTAATCGCTGATGCTCTTAGCAGACCAGAGGCTTCTAT  
C CTACAAGAAAGGCTCTCAAAACGTAATTGCTGATGCTCTCAGTAGACCAGAGGCCTCTGT  
\*\* \*\* \*

S AAACCATAATGAAGCACTACCGACTAGCCAAAATGCCTTTCCATTTTTTCGGAGAAACC  
C CAACCATAACGAAGCCCTATCAATTCCTCAAAATGTTTGCCCA--TCTCAGAGAAACC  
\*\*\*\*\*

S CCTTAATGACTTTAACATTACGCTCCTGTTCAAATAACCCCAAACACAAATTATACCGT  
C CCTTAATGATTTTAATATTACGCTCCTGTTCAAATAACCCCAAGATACAAATTACGCCAC  
\*\*\*\*\*

S ACTGACCCCATTTAAACATAAACTCAGGAGAGAATTCTGCAAACCTGATTTTCAATATGA  
C ACTGACCCCGTTTAAACACAACTTAGGAGGAATTCTGTAAACCAATTTTCAGTATGA  
\*\*\*\*\*

S AGAAGTAGTTAATATTCTTAAGCAATCGTTGAAACCAAACAAGACATGTGCAGTATTTGC  
C CGACGTAGTTTGCATTCTTAGGCAGTCGTTAAACCAAACAAGACATGCGCGGTATTTGC  
\*\* \*\*\*\*\*

S CCCTGATCATGTTTTCCAAGTGGTGAACGAGCCTACCATACGTACTTCTCGGCCGACGG  
C CCCCACCACATTTTTCAAATGGTGGAACAAGCCTACCAACCTACTTCTCAGCCACAG  
\*\* \*\* \*

S TAAATTTAACTTATTAGA--TGACCTTTCTCCAGAAATGAGTGATAGTGCGGAGAT  
C TCAATTTAACTCATTAGATGTTTGATCTTCTCCCGAAATTACTGATAGTACGGAGAT  
\* \*\*\*\*\*

S TGAAGGTTTATAAACGACTATCACTGTAATAGCAACCATCGGGGGATCGATGAGACATA  
C CGAAAAATTATAACCGACTATCACTGTAATAGTAACCATCGAGGGATCGATGAAACATA  
\*\*\*\*\*

S TTTGCACATAAAACGGCAACAGTATTTCCCATATATGAAAGAAAGAATAACTCAGTTAAT  
C TTTATACATAAAACGACAACAGTTCTTCCCATATATGAAGGAGAGAATAACTCAGTTAAT  
\*\*\* \*\*\*\*\*

S TAGGAAATGCGAAACTTGTTTAAAATTAAAATATGACAGACAGCCCCAAAAGATCACCTA  
C TCGAAATGCGAAACATGTTTAAAATTAAAATATGACAGACAACCTCAAAAGATCACCTA  
\* \* \*\*\*\*\* \*\* \*\*\*\*\*

S CCAAATTCCCGAACTAGCTCCAAAACCGTTGGACATTCTACATATAGATATTTACACCAT  
C CCAAATATCCGAACCTTCAAAAGCGTTGGACATCTTACATATAGACATTTATACTAT  
\*\*\*\*\* \*\*\*\*\* \*\* \*\*\*\*\* \*\*\*\*\* \*\* \*\*

S TAATAAAAATTACAACCTGACTATTATCGACAAATTCTCCAAATTCGCAGCTGCTTACCC  
C TAACAAAAATTATAACCTTACTATTATCGATAAATTTTCTAAATTTGCGGCTGCCTACCC  
\*\*\* \*\*\*\*\* \*\*\*\*\* \*\*\*\*\* \*\* \*\*\*\*\* \*\* \*\*\*\*\*

S TATAGCTAATAGGAATTGTATTAACGTAGTTAAAGCTTTAAAACATTTTCATTTCCCAATT  
C TATACTAATAGGAATTGTATTAACGTAGTTAAAGCCTTAAAACATTTTCATTTCCCAATT  
\*\*\*\* \*\*\*\*\* \*\*\*\*\*

S TGAATACCTAAAAAATTATCTACGATCAGGGAGCAGAATTCGCGAGTGATATGTTCAA  
C TGGTATTCCCAAAAAGCTGATCTATGATCAGGGAGCAGAATTCGCTAGCGATATGTTCAA  
\*\*\* \*\* \* \*\*\*\*\* \*\* \*\*\*\*\* \*\* \*\*\*\*\*

S CAAGTTTTGTACTCAATTTAACATTGATCTACACGTTACATCCTTCCAACAATCGTCCAG  
C TAAGTTCTGCACTCAATTTAACATTGACCTGCACGTTACGTCCTTTCAACAATCCTCTAG  
\*\*\*\*\* \* \*\*\*\*\* \*\* \*\*\*\*\* \*\* \*\*

S TAACTCTCCCGTTGAACGCCTTCACTCGACACTTACTGAGATTTACAGGATAATACTCGA  
C TAACTCTCCCGTTGAACGGCTTCACTCGACACTAACTGAGATTTACAGAATAATACTTGA  
\*\*\*\*\* \*\*\*\*\* \*\*\*\*\* \*\*\*\*\* \*\*

S CACTAGGAAACAGCAGAAACTCAAAGAAGAACACGACGAAATTATGTCCGAAGCCTTAAT  
C CGTCAGGAAACAACAGAAACTCAATAGCGAACATGACGAGATAATGTCCGAAACCTTAAT  
\* \*\*\*\*\* \*\*\*\*\* \*\*\*\*\* \*\* \*\*\*\*\*

S TACATACAATAATGCTATACACTCCGCGACTAAACATACCCCCTTTGAACTGTTTAACGG  
C CACATATAATAACGCTATTTCATTCTGCGACTAAACATACCCCCTTTGAACTATTTAACGG  
\*\*\*\*\* \*\*\*\*\* \*\*\*\*\* \*\* \*\* \*\*\*\*\* \*\*\*\*\*

S ACGTACTCATATATTTGATCAAGCAATCAAGTTCAATAACGAACACGACTACTTAACGAA  
C ACGTACTCATATATTTCAACCAAGCAATCCAGTTCAATAACGAACACGACTACTTAACGAA  
\*\*\*\*\* \* \*\*\*\*\* \*\*\*\*\* \*\*\*\*\*

S ATTAATGAATTTTCGCGAAAAGTTGTATCCCTTTATCACGGA AAAACTTTCAAATGATGT  
C ATTAATGAATTTTCGCGAGAAGTTGTACCCCTCATCACGGA AAAACTTTCAAATGACGT  
\*\*\*\*\* \*\*\*\*\* \*\* \* \*\*\*\*\* \*\*\*\*\*

S AGTCAAGAGAACTCTTAAACTAAACGAAAACCGAACAAACCCTGTAGACCTACAGCCCGA  
C AGTTAGGAGAACCCTAAAATTAAATGAAACCCGAACAGACCCCGTAGACCTACAACCAGA  
\*\*\* \* \*\*\*\*\* \*\* \*\* \*\*\*\*\* \*\*\*\*\* \*\*\*\*\* \*\*\*\*\* \*\* \*\*

S CATTTTAATCCTCAGAAAAGAAAATAGACGTAATAAAACTACACCTAGGTTCTCAATTCA  
C CACTTTAGTCCTTAGGAAGGAAAACAGACGTAAGAAGATTACACCCAGGTTTTCGATTCA  
\*\* \*\*\*\* \*\*\*\*\* \*\* \*\* \*\*\*\*\* \*\* \* \*\*\*\*\* \*\*\*\*\* \*\* \*\*\*\*\*

S CAAAGTCAAACCTTGACAACGGCCGTACACTGATAACAACCAGAAACCAAAAATTACATAA  
C CAAAGTCAAACACGACAAAGTCATACATTGATACTACTAAGAATCAAAAACCTACACAA  
\*\*\*\*\* \*\*\*\*\* \*\* \* \*\*\*\*\* \*\*\*\*\* \*\* \* \*\*\*\*\* \*\*\*\*\* \*\*

S ATCAAAGATTTCGAAAGACAGTTTTTAAAAAAGGGGAAAAGTAATAACTTACCTAATACTG  
C ATCAAAAATTTCGAAAACAGTTTTTGAAAAA - GACAAAAGCAACAACGTACCCAACACTG  
\*\*\*\*\* \*\*\*\*\* \*\*\*\*\* \* \*\*\*\*\* \*\* \*\*\*\*\* \*\* \*\*\*\*\*

S ATAATACTGACCCACGCCTTCTTAACTTACCATTTTCAGGTTTACCCTTGGGTCAACTC  
C ATAATACTGACCCCACTACCTTTTAACTTACCATTTTCAGGTTTACCCTTGTGCCAACTC  
\*\*\*\*\* \* \* \*\*\*\*\* \*\*\*\*\* \* \*\*\*\*\*

S AGGCTATCTCTGTTCACTACCTAAATGACAGCACCCCATAGCCAAGATAGAATTAGGAC  
C AGGCTATCCATGTCCATTATTTAAATGATAACGCCCTATAGCCAGGATAGAAGTAGGGA  
\*\*\*\*\* \*\*

S AAGCCCTTTTAAATCGAAAGATATAAAATAATCAATCACGTAATTGATTTGCAAGATTATA  
C AAGCCTTACTAATTGAGAGGTACAAAATAATTAGTCATGTAATCAACCTACAAGACTACA  
\*\*\*\*\*

S GTCGTTGCTTAGAACAGTTCACCTCACGATAAATACCTTCCACCCAGACATCACTCTAG  
C GCAGATGTATGGAACAATTCCATCTGACCATTATAAATTTAACCCGATTCCACGTTGA  
\* \* \* \* \*

S CAGACTCTGTTGCAGTGCTTAAGGCTAAGCTAACCCAAGCCCAAGTAAACTAAATGCTC  
C CGGACTCCGTCACAATTTTAAAAGCCAAATTAACCCAAGCCCAAGTAAAGCTCAAAGCCC  
\* \* \* \* \*

S TTACACCTTACAAAAGGAATAAACGTGGGTTGTTTAAATGGGCTGGGGAGTTTGGTTAAAG  
C TTACACCTTCATATAGAAACAAACGGGGTTTGATTACGGATTGGGGAGTCTAGTAAAGG  
\*\*\*\*\*

S TGGTCACTGGCAACATGGATGCTAATGACGCTAAAGAAATAAACGAACAATAAACAATA  
C TGGTTACGGCAATATGGATGCCAACGACAATAAAGAAATACATGAAGAACTTGACAATA  
\*\*\*\*\*

S TAAAGGAAGACACTAAAGTTGCCAATATGAATCTCGAAAGACAAGAAATATTCAATAACG  
C TAAAGAAAAATTCGAGGTCAGTAATGACAATCTCCAAAAACAAGTAATGTTTAAACAACG  
\*\*\*\*\*

S AAATTCTTATTCGGTTTGAAAATATAACCGATCATATCAATAATGAACAAATTTTAATAC  
C AAATACTTATCCGGTTGAAAATATCACGGACCATATAAATAATGAGCAAATTTTGATAA  
\*\*\*\*\*

S AAAATTTTTTCGAAAGTTCACAAAACAAAATTTTTAAACAATTAAATTTACATGACACCC  
C GTAAATTTCTTTGATACCTCACAAAACAAAATCTACAAACACTTAACTTACAAGATACCC  
\* \* \* \* \*

S TTTTAGAGAAAATACAGTACTTAAACAGGATAAATTATAATATAGAATTACTCCTTAACC  
C TTCTGGAAGAAATACAATATTTAAATAGGATTAATTATAACATAGAATTATTCATTAACC  
\*\* \* \*

S ATCTAAGCGATATAACTGAAAGTATGATCCTTGCAAAAGTAAATGTAATCCCTAAATTTA  
C ACCTAAACGACATAACAGAAAGTATGCTATTGGCGAAAATAAATATAATTCCCAAGTTCA  
\* \* \* \* \*

S TCTTAAATCAAGATGAAATAATGAACTAAAGAAAATACTGGAAATACAAAATGTAACAA  
C TCCTAAATGAACAAGAAATGGATAAAATAAAAACAATACTGGAAAAACAAAATATCACAG  
\*\* \* \*

S TTAAACTGAACAAAATATTTATGATTTTTTAAAGATGAATACACTAAGTTTTGAACAAA  
C TCAAAAATGAACAAAGTATATACAATTTCTACAATGAATACACTAACTACGAACAAA  
\* \* \* \* \*

S AAATAATCTTTAGTATTAAGTCCCAATTTTTAAACAATCCATGTACACCCTTGCTAGAA  
C AGATTATTTTTAATATCAAAGTCCCAATTTTTAAACAACCTTTTCATACCCTCGCCAGAC  
\* \* \* \* \*

S TAGTTCCACTACCATTAAATAATTCCTTCTTTGTAATAACCCGAATTATCTAGCTTATA  
C TAGTTCCATTACCAATAAATAACACATGTTTTGTAATAACCCCAATTACCTAGCTTATA  
\*\*\*\*\*

S ATATTAATAATAAGACATTCCAATGACTCATAAATGCCCCAACTAAATGATGTGTTCC  
C ATATTAATAATAAGAAATTTTCATATGACCCGTAAATGCCCCAACTGGATAATACATTCT  
\*\*\*\*\*



|   |                                                                |
|---|----------------------------------------------------------------|
| S | TGTGCGGCGAAGACCTTTATAGCGACGTCTCACTTAATAGTACATGCGTAGCACACCTTC   |
| C | TGTGCGACGAGAACCTTCTACGTTGATACACCACAGAACAACACATGCCTGGAACACCTTT  |
|   | ***** ** * ** ** ** ** ** ** * * * * *                         |
| S | TAAACGACGAAAATGGTTCTTGCAATGTACGAGAGACCGTCCCTATCGCCGATGTGTTTCG  |
| C | TGAACGGAGAAAACAGTTCCTGCGATGTACGGGAAACCGGCCCATCACCGACGTGTTTCG   |
|   | * **** * * * * * * * * * * * * * * * * * * * * * * * * *       |
| S | AGGCAGAAGCGGGCTACATTTTTGCGTTCAACGTTGACAACCTTATAATCTCCTTGACAA   |
| C | AGGCAGAGAGAGGTTACATCTTCGCATTCAACGTGAACAACTAAAGGTATCCCTAACAA    |
|   | ***** ** * * * * * * * * * * * * * * * * * * * * *             |
| S | ACGGCACTGACCTCATTGTTAATGGGTGAGTTATAATAAACTACGCCAACGAAACACTGA   |
| C | ACGGCTACGAGCTCTCAATAATGGGGTCAGCCATCATCAGATACATTAACGAAACAATAC   |
|   | ***** ** * * * * * * * * * * * * * * * * * * * * *             |
| S | GTATTAACGGCATCAATTATGATAACACGATTGATTCATCATCTGAACAACTGGATCTCG   |
| C | AGATTAACGGTATCGATTACGACGGCACGGTTGACAC-----                     |
|   | ***** ** * * * * * * * * * *                                   |
| S | TCCTTCCTCCGATGCAAAAAATCAATAAGAATGCTACTGTTATGGTGCTAAGCCTAGAGA   |
| C | -----                                                          |
| S | GATTACACTTGGAAGCGGCCGAAACAAGGAATAAAGTAATAGCCGTTCGCCGTTTACAAC   |
| C | -----                                                          |
| S | ACACCTGGAGCCTTTACATCCTGCTGGGCCTGGCAACAGTTTCAACAGTCATCTTATGGC   |
| C | -----                                                          |
| S | TGAAACGACGCACGAAACATGTTCTTCATGTCCACGAAGACCATCACCTTCCCATCTACG   |
| C | -----                                                          |
| S | CCCCACCCATACCTTCGCTATGGCCGTCGCTTCGAACTGGGGAGGGAGGAGTTACCACCC   |
| C | -----                                                          |
| S | CACCCCCTAAACCCCCACGCCTCTAACGAATCGGACACCGAACCAGGGAAGACGACAACCTG |
| C | -----                                                          |
| S | GAGCACCGCATCCGGCCAAATGCTGACTTAGCAGTCAATGTTGCACAGCAACATTGTCGG   |
| C | -----                                                          |
| S | ACAAAGGGAGCCGGCTGACCAAATGCTGAAGTGGCATGGAAATTATGTTTACAATTAATA   |
| C | -----                                                          |
| S | CTATGTATATCTATAAGTTGGAAACGGAGGGCTCAAGTGGAGAACCTCCGAAAATAAAAA   |
| C | -----                                                          |
| S | CTCACTCTGTTTCTGAATCTTATCGAAGAAAGACGTGTTCTTTAATAAACTTATAAACAT   |
| C | -----                                                          |
| S | ACAAACTCAAATTATACAAAAGGAACCCAAGTCACCATCCTGTTTCACGCACAGGACTAC   |
| C | -----                                                          |

S  
C

TTTGATAACTCTCACCGTCCCGCTCCACGCTCAGGTCGACGTTGTTAACTCGCGCA  
-----
